# Supplementary material for: Nanoval Technology—An Intermediate Process between Meltblown and Spunbond
Source: MDPI journal article supplement (doi:10.3390/ma16072932), 2023-04-06
Supplement: s1 [file s1]

Supplementary Material to

**Flexible creation of fine and coarse fiber diameters in meltspun nonwovens using the Nanoval Laval-die process as an intermediate technology between meltblown and spunbond processes**

T. Höhnemann\*, J. Schnebele\*, I. Windschiegl, W. Arne

***Material characterization and suitability characterization for the Nanoval process***

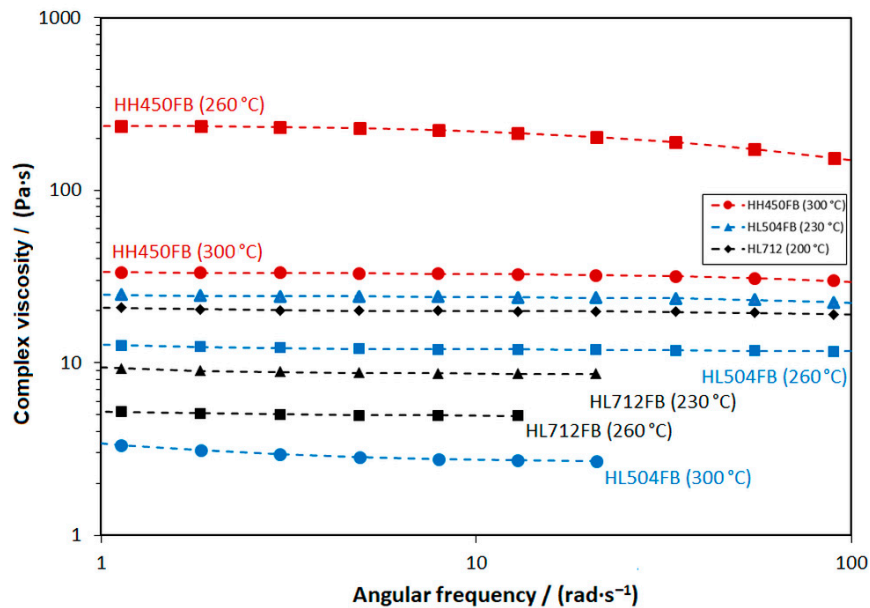

**Figure S1:** Plot of complex viscosity vs. shear rate ( $\varepsilon = 10\%$ ) for the different polypropylenes at different temperatures.

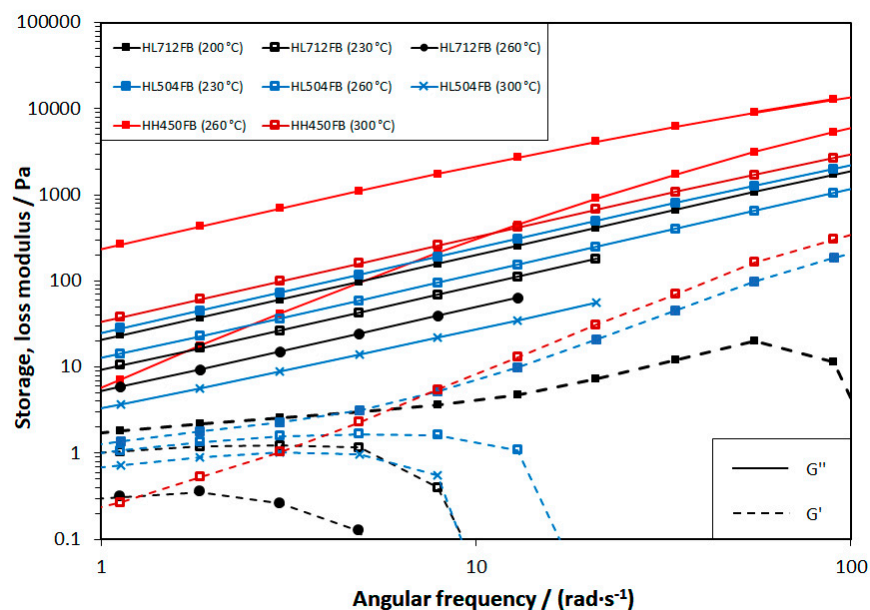

**Figure S2:** Plots of storage and loss modulus from the frequency sweeps ( $\epsilon = 10\%$ ) for the different polypropylenes at different temperatures.

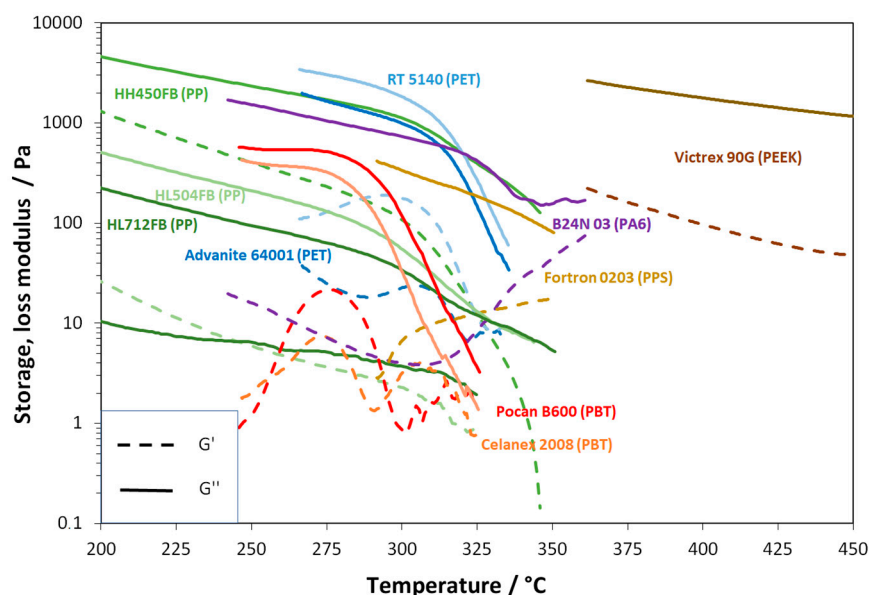

**Figure S3:** Plots of storage and loss modulus from the temperature sweeps ( $\epsilon = 10\%$ ,  $\omega = 10 \text{ rad}\cdot\text{s}^{-1}$ ,  $\dot{T} = 0.5 \text{ K}\cdot\text{min}^{-1}$ ) for all polymers tested.

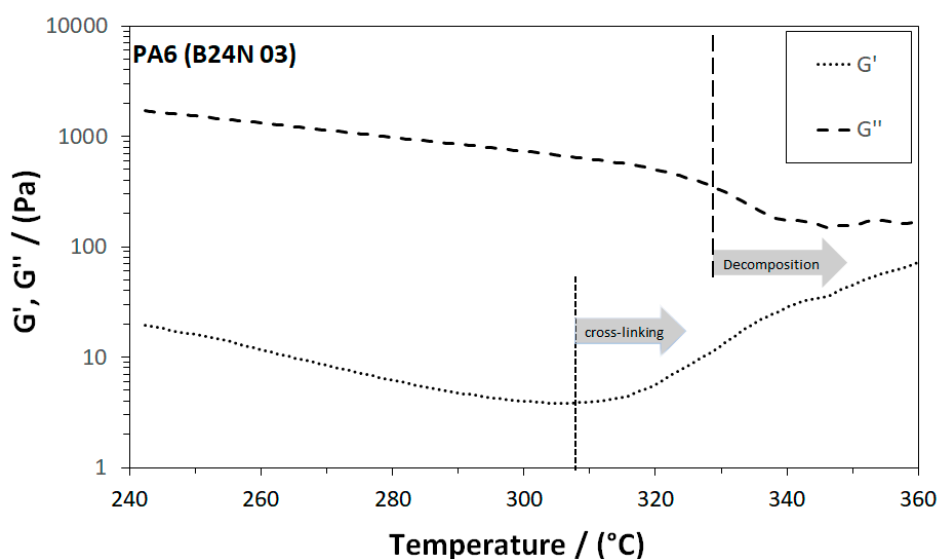

**Figure S4:** Indication for interaction of degradation and crosslinking of B24NO3 (PA6) in the plot of  $G'/G''$  vs. temperature.

### Experimental characterization of the Nanoval process

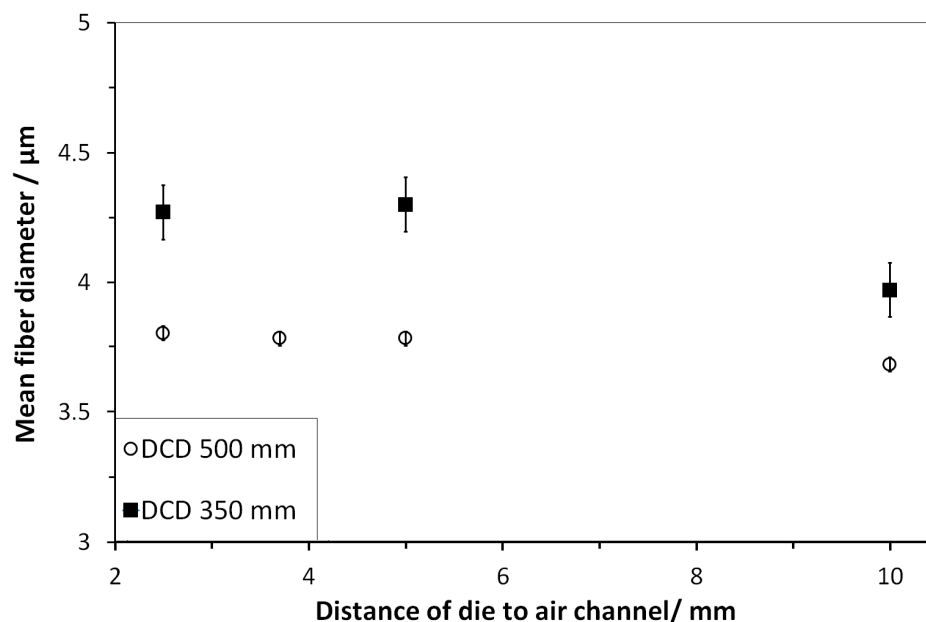

**Figure S5:** Plot of mean fiber diameter vs. distance of die to air channel (DDAC) for two different DCDs (PP HL712FB,  $\dot{V} = 3.8 \text{ g}\cdot\text{ho}^{-1}\cdot\text{min}^{-1}$ ,  $\dot{V}_{\text{air}} = 220 \text{ Nm}^3\cdot\text{h}^{-1}$ )

**Table S1:** Resulting fiber diameters of polypropylenes of different molar mass at same process setting;  $T_{\text{melt}} = 300 \text{ }^{\circ}\text{C}$ ,  $\dot{V}_{\text{air}} = 220 \text{ Nm}^3\cdot\text{h}^{-1}$ .

| Polymer                                                            | Median | Mean          | stdev. | Die pressure |
|--------------------------------------------------------------------|--------|---------------|--------|--------------|
| -                                                                  | Mm     | $\mu\text{m}$ | Mm     | bar          |
| $\dot{V} = 1.9 \text{ g}\cdot\text{ho}^{-1}\cdot\text{min}^{-1}$ : |        |               |        |              |
| PP HL 712 FB                                                       | 2.94   | 3.74          | 0.17   | 25.4         |
| PP HL 504 FB                                                       | 5.47   | 6.78          | 0.41   | 35.5         |
| $\dot{V} = 3.8 \text{ g}\cdot\text{ho}^{-1}\cdot\text{min}^{-1}$ : |        |               |        |              |
| PP HL 712 FB                                                       | 2.09   | 2.43          | 0.13   | 20.0         |
| PP HL 504 FB                                                       | 3.87   | 4.66          | 0.37   | 27.5         |

The higher viscosity of the polymer melt passing the die results in an increase of the die pressure drop of around 40% and results in almost doubled fiber diameters. So, the identical air amount is not sufficient to stretch the higher viscous polymer mass as efficient and less homogeneously.
